# Supplementary material for: Recent trends in catalytic sp3 C–H functionalization of heterocycles
Source: Royal Society of Chemistry journal article supplement (doi:10.1039/c9ob01559k), 2020-01-01
Supplement: c9ob01559k1.xlsx [file c9ob01559k1.xlsx]

## Sheet: alpha_csv
DOI	First Author	Bond Formation	Reaction Partner	Mechanism	6-Resonant	6-Non-Res	5-Resonant	5-Non-Res	5-Single-Het	8-Quino	Remote	All Others
10.1002/adsc.201700380	Ablajan, Keyume	C-C	C-Br	Organometallic	27
10.1016/j.tetlet.2017.10.078	Akutsu, Hiroshi	C-C	C=C	Organocatalysis					14
10.1039/c7ob02486j	Alanine, Thomas	C-N	RN-H	Organometallic								12
10.1021/acs.joc.7b03090	Arupula, Sanjeeva	C-C	C=C-COR	Organocatalysis	47		20
10.1002/chem.201601597	Barsu, Nagaraju	C-N	N-O	Organometallic						24
10.1002/ejoc.201101833	Bassoude, Ibtissam	C-C	C-Br	Organometallic	7
10.1039/c6ob00108d	Beisel, T.	C-C	C=N	Bronsted Acid	39
10.1039/c8sc00590g	Bentley, Keith	C-N	N=N	Radical	20		1
10.1021/ja3083494	Best, Daniel	C-C	C=N	Lewis Acid	7		16
10.1021/ja9095413	Blank, Benoit	C-C	C-OH	Organometallic	21
10.1016/j.tetlet.2014.08.061	Blocker, Mark	C-C	C=N	Bronsted Acid	13
10.1002/slct.201900579	Bojanowski, Jan	C-C	C=C	Bronsted Base	16
10.1002/chem.201806288	Brandhofer, Tobias	C-N	N=N	Radical	3							5
10.1002/adsc.201600735	Bruneau, Christian	C-O	O=O	Radical	27
10.1021/ol102276e	Burton, Paul	C-C	C-Br	Organometallic	27
10.1039/c5sc03704b	Cao, Xinyu	C-C	C-Br	Organometallic	18	2						1
10.1039/c4cc00728j	Ceban, Victor	C-C	C=C-CH2OBoc	Multiple	2		19
10.1016/j.tetlet.2014.10.058	Chatterjee, Sourav	C-C	C=C	Lewis Acid	17
10.1016/j.tetlet.2013.09.077	Chaudhari, Chandan	C-C	C-OH	Organometallic	7
10.1039/c5ra16334j	Chavan, Santosh	C-C	C=O	Lewis Acid	17		21
10.1039/c5ra20728b	Chavan, Santosh	C-C	C=C	Lewis Acid			18
10.1002/ajoc.201800421	Chen, Xue	C-O	R-OH	Organometallic	34		1
10.1021/acs.joc.7b02700	Chen, Yongtao	C-Other	Na-S	Organometallic					22
10.1021/acs.joc.8b02794	Cheng, Li	C-O	RO-H	Radical	25					1
10.1039/c5cc04052c	Cho, Beom Shin	C-C	C-I	Organometallic					15
10.1021/jacs.7b12864	Cooper, Julian	C-O	O=O	Radical	19
10.1002/anie.201108540	De Houwer, Johan	C-O	O=O	Radical	24
10.1007/s11164-018-3573-z	Dong, Dao-Qing	C-Other	S-O	Radical	24		1
10.1002/adsc.201801045	Duan, Shengzu	C-C	C-Br	Organometallic	33		1
10.1021/acs.joc.6b03095	Feng, Tong-Yu	C-C	C-OH	Organometallic	21		1
10.1021/acs.joc.7b02375	Fukumoto, Yoshiya	C-Other	Si-H	Organometallic	14		1
10.1021/acscatal.7b00539	Fukumoto, Yoshiya	C-Other	Si-H	Organometallic	20
10.1039/c5sc02739j	Gao, Feng	C-C	C-Br	Organometallic	45
10.1002/adsc.201700438	Gao, Gui	C-C	C-Br	Organometallic	24
10.1021/ol501422k	Gao, Xu	C-N	N=O	Bronsted Acid	27
10.1021/acs.joc.7b01934	Garad, Dnyaneshwar	C-O	RO-H	Organometallic	7					11
10.1016/j.tetlet.2012.12.013	Graves, Vincent	C-C	C=O	Lewis Acid	30
10.1002/anie.201208867	Guan, Bing-Tao	C-C	C=C	Organometallic	22
10.1002/chem.201801717	Guha, Somraj	C-O	O=O	Redox	12		5
10.1002/anie.201002108	Guo, Chang	C-C	C-H	Lewis Acid					20
10.1021/acs.orglett.6b02295	Han, Sangil	C-C	C=C	Organometallic						30
10.1002/ajoc.201700261	Han, Shengnan	C-C	C=C	Organometallic						31
10.1002/anie.201508912	He, Chuan	C-C	C-B(OR)2	Organometallic								22
10.1038/ncomms6943	He, Jing	C-C	C=N	Organometallic								14
10.1002/chem.201800585	He, Xiao-Long	C-C	C=C-COR	Organocatalysis					22
10.1246/cl.171137	Hirano, Masaya	C-Other	Si-H	Organometallic			18
10.1039/c3cc44197k	Höke, Thorsten	C-N	RN-H	Organometallic		9
10.1039/c6cc03846h	Hou, Wei	C-C	C=N	Organometallic	1					20
10.1039/c6sc03831j	Hruszkewycz, Damian	C-O	O=O	Radical	3	3	5		2
10.1021/acscatal.6b02015	Hu, Xu-Hong	C-N	N-I	Organometallic	8					7
10.1246/cl.150848	Huang, Xiaolei	C-N	RN-H	Organometallic						24
10.1016/j.tetlet.2010.10.055	Huang, Xiong	C-C	C=C	Multiple	13
10.1021/ol500655k	Itoh, Masaki	C-C	C=N	Organometallic	20
10.1002/ejoc.201403203	Jamal, Zaini	C-C	C=C	Lewis Acid	32
10.1039/c4ra17182a	Jamal, Zaini	C-C	C=O	Lewis Acid	25
10.1016/j.tet.2016.03.004	Jamal, Zaini	C-C	C=O	Lewis Acid	35		1
10.1039/c7cc06670h	Jeong, Taejoo	C-N	N=N	Organometallic						25
10.1039/c0cc00841a	Jiang, Huangfeng	C-O	RO-H	Organometallic	12
10.1016/j.tet.2014.02.069	Jiang, Kun	C-C	C=O	Lewis Acid	18
10.1039/c2ra20627g	Jin, Jia-Jia	C-C	C=O	Lewis Acid	21
10.1016/j.tet.2013.05.135	Jin, Jia-Jia	C-C	C=O	Bronsted Acid	27
10.1002/anie.201410432	Jin, Jian	C-C	C-H	Redox								25
10.1021/acs.orglett.7b02421	Kayal, Satavisha	C-C	C=C-COR	Organocatalysis	16
10.1021/acscatal.6b02392	Kim, Ju Hyun	C-C	C-Br	Organometallic	8					19
10.1039/c6cc09830d	Kim, Saegun	C-C	C=C	Organometallic						29
10.1021/acs.orglett.6b03407	Kljajic, Marko	C-C	C=C-COR	Organometallic	6		17
10.1021/ol200217y	Komai, Hirotomo	C-C	C=C	Lewis Acid	16		1
10.1055/s-0031-1291041	Komai, Hirotomo	C-C	C=N	Lewis Acid	33		2
10.1021/acs.orglett.7b01650	Kong, Lingheng	C-C	C-Cl	Organometallic						33
10.1039/c7cc06048c	Kong, Lingheng	C-C	C-F	Organometallic						36
10.1002/adsc.201701185	Kowalczyk, Dorota	C-C	C=C-COR	Organocatalysis	21
10.1039/c4gc02287d	Kumar, Atul	C-C	C=O	Bronsted Acid	24
10.1002/asia.201501096	Kumar, Gadde Sathish	C-C	C=O	Lewis Acid	2					27
10.1039/c9ob00337a	Kumar, Jogendra	C-O	R-OH	Organometallic			28
10.1021/acs.joc.8b02974	Kumar, Rakesh	C-C	C=C	Organometallic						42
10.1039/c3ra47332e	Kumari, Kumkum	C-C	C=O	Bronsted Base	24
10.1039/c5dt02772a	Landge, Vinod	C-C	C-Br	Organometallic						16
10.1039/c3ob42039f	Lansakara, Asabha	C-C	C=O	Bronsted Acid	14
10.1038/nature22813	Le, Chip	C-C	C-Br	Multiple								31
10.1021/acs.orglett.6b03731	Lee, Melissa	C-O	RO-H	Radical								10
10.1039/c9cc00641a	Lee, So Jeong	C-F	Ag-F	Organometallic						10
10.1021/acs.joc.8b00016	Li, Jie	C-C	C-F	Organometallic	19
10.1021/acs.orglett.8b03276	Li, Lesong	C-O	RO-H	Organometallic						23
10.1002/anie.201310711	Liu, Bingxian	C-C	C(triple)C	Organometallic						25
10.1039/c5cc06230f	Liu, Bingxian	C-N	N=N	Organometallic						23
10.1021/acs.orglett.7b00690	Liu, Bingxian	C-C	C=C	Organometallic						31
10.1002/anie.201300459	Liu, Dong	C-C	C-H	Radical					1			15
10.1002/anie.201409580	Liu, Jianming	C-O	O=O	Radical	19	1	3
10.1021/jacs.6b00180	Liu, Jie	C-N	N-O	Radical	5		1		3
10.1039/c2cc35309a	Liu, Jin-Ying	C-N	N=N	Lewis Acid	14
10.1039/c5cy02069g	Liu, Min	C-O	O=O	Radical	17		1
10.1002/anie.201700433	Liu, Xi-Jia	C-C	C=C-COR	Organometallic	23
10.1021/acs.joc.8b00286	Liu, Xiaozu	C-N	RN-H	Redox					43
10.1016/j.tetlet.2015.08.059	Liu, Xiong-Li	C-C	C=C-COR	Organocatalysis	16		16
10.1039/c8qo00207j	Liu, Zhengfen	C-C	C-Br	Organometallic	58
10.1002/anie.201600654	Loh, Charles	C-C	C=C-COR	Organometallic	22
10.1021/acs.organomet.6b00655	Lopez, Michael	C-C	C(triple)C	Organometallic	8
10.1016/j.tetlet.2018.02.001	Loubidi, Mohammed	C-C	C-Br	Organometallic	5
10.1039/c4ra14144j	Lu, Beili	C-C	C=C	Lewis Acid	17
10.1002/anie.201705431	Luo, Yong	C-C	C=C	Organometallic	30
10.1021/jacs.5b09342	Makarov, Ilya	C-C	C=O	Organometallic								24
10.1002/ejoc.201400073	Mao, Dan	C-C	C=O	Lewis Acid	65
10.1016/j.tetlet.2015.01.189	Mao, Jianyou	C-C	C-Br	Organometallic	7	1
10.1021/jacs.8b04890	McManus, Joshua	C-C	C=C	Redox								12
10.1021/ol301739f	McMurtrey, Kate	C-Other	Cs-F	Organometallic						10
doi.org/10.1126/science.1213920	McNally, Andy	C-C	C-CN	Redox								27
10.1002/chem.201404565	Meazza, Marta	C-C	C=C	Multiple	1		11
10.1002/anie.201611306	Meazza, Marta	C-C	C=C	Multiple	23
10.1039/c3cc42675k	Mita, Tsuyoshi	C-Other	B-B	Organometallic	12
10.1021/ol1002576	Mukai, Tomoya	C-C	Ar-CH2OLG	Organometallic			8
10.1002/anie.201802821	Murakami, Ryo	C-C	C=C-COR	Organometallic	21
10.1039/c6ob02432g	Muthukumar, Alagesan	C-C	C=O	Lewis Acid	37
10.1039/c5ra16721c	Nagaraju, Sakkani	C-C	C=O	Bronsted Base			22
10.1021/ol2030982	Niu, Rui	C-C	C=O	Bronsted Acid	19
10.1021/ja506094d	Noble, Adam	C-C	C=C	Redox								26
10.1021/jo3019347	Obora, Yasushi	C-C	C-OH	Organometallic	15		1
10.1039/c6ra17410h	Pang, Xiaobo	C-Other	I-I	Radical	17
10.1016/j.tetlet.2013.08.110	Pawar, Lokesh	C-C	C(triple)C	Lewis Acid	8
10.1039/c4ra10939b	Pi, Danwei	C-C	C=O	Lewis Acid	72
10.1039/c4sc02155j	Prier, Christopher	C-C	C-Cl	Redox								38
10.1002/adsc.201000556	Qian, Bo	C-C	C=N	Lewis Acid	40
10.1021/ja910104n	Qian, Bo	C-C	C=N	Lewis Acid	27
10.1021/ol200684b	Qian, Bo	C-C	C=N	Lewis Acid	35
10.1002/adsc.201200285	Qian, Bo	C-C	C=C	Lewis Acid	25
10.1016/j.tetlet.2012.12.055	Qian, Bo	C-N	N=N	Lewis Acid	15
10.1039/c8qo00764k	Rana, Jagannath	C-C	C-OH	Organometallic	23		1
10.1021/acs.orglett.8b03701	Ren, Didi	C-C	C-OH	Bronsted Acid					21
10.1021/acs.orglett.5b00602	Ren, Lanhui	C-O	O=O	Radical	17
10.1021/jacs.9b01952	Reyes, Ronald	C-B	B-B	Organometallic	9		7
10.1021/acs.orglett.6b00450	Rivero, Alexandra	C-C	C-Br	Organometallic	32	1
10.1021/ol103150g	Rueping, Magnus	C-C	C=N	Lewis Acid	24
10.1039/c8sc02041h	Sarkar, Rahul	C-C	C=C-COR	Organometallic	33
10.1021/acscatal.6b00612	Sen, Malay	C-C	C(triple)C	Organometallic						33
10.1021/ja409511n	Sha, Sheng-Chun	C-C	C=C-CH2OBoc	Organometallic	18	4			3			2
10.1002/anie.201507494	Sha, Sheng-Chun	C-C	C=C-CH2OBoc	Organometallic	10	3			2			2
10.1021/jacs.8b06699	Shang, Ming	C-C	C=C	Lewis Acid								36
10.1002/ejoc.201800589	Sharma, Vivek	C-C	C=C	Bronsted Acid								13
10.1126/science.aaf6635	Shaw, Megan	C-C	C-Br	Multiple								33
10.1021/acs.joc.8b03170	Shen, Yao-Bin	C-C	C=O	Bronsted Acid								18
10.1021/acs.orglett.9b00550	Shigeno, Masanori	C-C	C=O	Bronsted Base	3	1			16
10.1021/acs.orglett.7b03559	Shrestha, Anuska	C-O	RO-H	Organometallic						5
10.1021/acscatal.7b04434	Song, Chunlan	C-N	RN-H	Redox					34
10.1021/ol200345a	Song, Guoyong	C-C	C-Cl	Organometallic	6		19
10.3762/bjoc.12.16	Sterckx, Hans	C-O	O=O	Radical	31
10.1002/adsc.201700588	Sterckx, Hans	C-O	O=O	Radical	21
10.1021/acscatal.7b02667	Su, Yong-Liang	C-C	C=C-COR	Multiple					22
10.1039/c7cc03263c	Sun, Qiu	C-C	C=C	Organometallic	22
10.1002/anie.201611374	Suzuki, Hirotsugu	C-C	C=C	Bronsted Base	26		5
10.1039/c4ob00215f	Takemura, Noriaki	C-O	RO-H	Radical	3		17
10.1002/anie.201500346	Talwar, Dinesh	C-C	C=O	Organometallic	38
10.1039/c6cc03996k	Tan, Zhenda	C-C	C=O	Organometallic	27
10.1002/chem.201602556	Tang, Conghui	C-N	N-O	Organometallic						28
10.1016/j.tetlet.2018.03.020	Tashrifi, Zahra	C-C	C=N	Bronsted Acid	14
10.1021/ja205523e	Trost, Barry	C-C	C=C-COR	Organometallic	9		3
10.1021/ja1100118	Tsurugi, Hayato	C-C	C(triple)C	Organometallic	3
10.1039/c8cc06370b	Vellakkaran, Mari	C-C	C-OH	Organometallic	22
10.1055/s-0030-1259518	Vera, Silvia	C-C	C=C	Organocatalysis	13
10.1016/j.tet.2012.07.051	Vuppalapati, Srinivasu	C-C	C=O	Lewis Acid	18
10.1039/c4gc00038b	Wang, Fang-Fang	C-C	C=N	Multiple	17
10.1002/anie.201506323	Wang, He	C-N	N-O	Organometallic						18
10.1021/jo5008515	Wang, Nuancheng	C-N	N=N	Organometallic						27
10.1002/anie.201503888	Wang, Xiaoming	C-C	C-B(OR)2	Organometallic	12					11
10.1002/adsc.201400311	Wang, Yaping	C-C	C-Br	Organometallic	36
10.1055/s-0031-1290815	Wang, Yi-Feng	C-O	O=O	Radical					24
10.1039/c4ra14486d	Wang, Zu-Li	C-C	C=O	Lewis Acid	18		3
10.1039/c7ob01726j	Wu, Jing	C-C	C-Br	Organometallic	24
10.1021/acs.orglett.7b03251	Wu, Xiang	C-C	C=C	Organocatalysis					31
10.1021/acs.joc.8b02439	Xia, Xuejian	C-C	C=N	Organocatalysis			22
10.1021/acs.joc.8b01486	Xiao, Fuhong	C-C	C=O	Redox	36		15
10.1021/acs.orglett.7b02294	Xiao, Mingyan	C-C	C-OH	Bronsted Acid	36
10.1002/anie.201700135	Xie, Jin	C-C	C-F	Redox								35
10.1002/chem.201002592	Xiong, Xiao-Feng	C-C	C=C	Organocatalysis			15
10.1002/anie.201706005	Xu, Hao	C-C	C=C-COR	Lewis Acid	37
10.1039/c8qo01375f	Xu, Lubin	C-C	C-OH	Bronsted Acid					16
10.1002/adsc.201700636	Yan, Sheng-Yi	C-C	C=N	Organometallic						28
10.1002/cjoc.201600826	Yang, Jun	C-Other	S-O	Lewis Acid	14
10.1002/ajoc.201600041	Yang, Luo	C-N	R-NH	Redox	24		1
10.1002/chem.201600704	Yang, Weibo	C-C	C=C	Organometallic			18
10.1021/acs.orglett.6b00815	Yang, Xiaodong	C-C	C-Br	Organometallic	21
10.1016/j.tetlet.2015.09.035	Yaragorla, Srinivasarao	C-C	C=O	Lewis Acid	41
10.1055/s-0035-1560385	Yaragorla, Srinivasarao	C-C	C=O	Lewis Acid	23
10.1021/acs.joc.6b02197	Yu, Jing-Bo	C-C	C-H	Redox					26
10.1002/anie.201602224	Yu, Songjie	C-N	N-O	Organometallic						40
10.1021/acscatal.6b02668	Yu, Songjie	C-C	C=O	Organometallic						26
10.1021/ol302983t	Zaimoku, Hisaaki	C-O	RO-H	Redox					21
10.1002/anie.201710128	Zhai, Dan-Dan	C-C	C=C	Bronsted Base	47		1
10.1002/anie.201801573	Zhang, Guoying	C-C	C-OH	Organometallic	33		1
10.1021/jacs.6b01578	Zhang, Jiadi	C-C	C-Br	Organometallic					14
10.1021/acs.orglett.8b03185	Zhang, Jun	C-N	N-O	Redox					24
10.1016/j.tetlet.2010.04.075	Zhang, Shouhui	C-O	RO-H	Organometallic						17
10.1038/ncomms14641	Zhang, Shuguang	C-C	C-Br	Organometallic	41		6
10.1002/adsc.201701347	Zhang, Shuguang	C-C	C-Br	Organometallic	8		18
10.1021/acs.orglett.8b02738	Zhang, Tao	C-N	N=N	Organometallic	9					5
10.1021/acs.joc.5b00735	Zhang, Wei	C-N	N-O	Organometallic						21
10.1039/c6ob00553e	Zhang, Xiaolei	C-N	N-F	Radical						18	1
10.1002/adsc.201400833	Zhang, Yong	C-C	C=C	Organocatalysis			20
10.1039/c6ra26126d	Zhang, Yong	C-C	C-H	Redox			15
10.1039/c4cc01444h	Zhao, Dan	C-N	RN-H	Redox	35
10.1021/acs.joc.8b00086	Zhao, Huaiqing	C-C	C=O	Organometallic						29
10.1039/c6cc00347h	Zheng, Junhao	C-Other	B	Lewis Acid	11
10.1016/j.tetlet.2017.09.022	Zhou, Bi-Hui	C-C	C-Br	Organometallic	14
10.1039/c7cc04433j	Zhou, Yao	C-N	N=O	Radical	21
10.1021/acs.orglett.7b03759	Zhu, Bo	C-N	N=N	Organocatalysis			34
10.1021/acs.joc.8b01573	Zhu, Bo	C-C	C=O	Organocatalysis			29
10.1021/ol502402s	Zhu, Zhi-Qiang	C-C	C-H	Multiple	24
10.1021/ja2015586	Stowers, Kara J.	C-C	C=C	Organometallic	17
